# Supplementary material for: Characterization and Genome Analysis of Staphylococcus aureus Podovirus CSA13 and Its Anti-Biofilm Capacity
Source: PubMed Central journal article supplement (PMC6356323; doi:10.3390/v11010054), 2019-01-12
Supplement: viruses-11-00054-s001.pdf [file viruses-11-00054-s001.pdf]

1 **Supplementary Data**

2

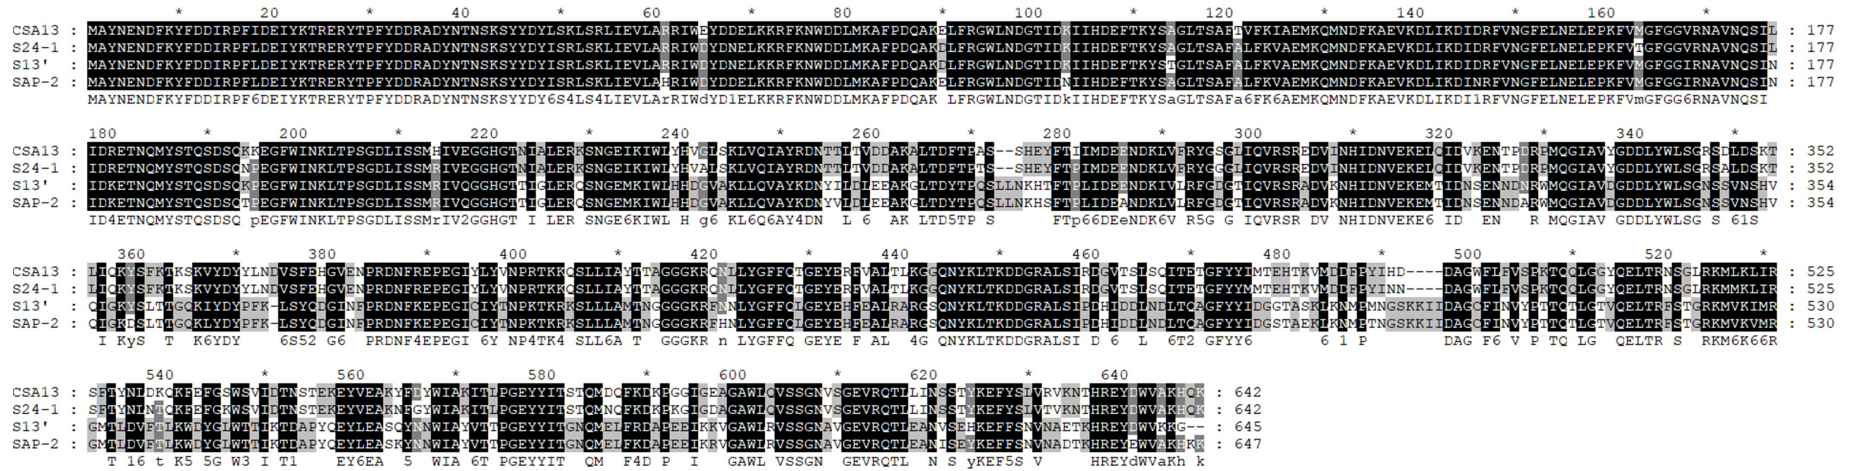

3

4 **Figure S1. Sequence alignment of putative receptor binding protein (RBP)**

5 The amino acid sequence of putative RBP from 4 different *S. aureus Podoviridae* phages were aligned using GeneDoc software. Alignment data between two  
6 sequences are as follows: CSA13 and S24-1, 95% coverage, 97% identity; CSA13 and S13', 67% coverage, 79% identity; CSA13 and SAP-2, 68% coverage, 79%  
7 identity; S24-1 and S13', 69% coverage, 80% identity; S24-1 and SAP-2, 69% coverage, 80% identity; S13' and SAP-2, 95% coverage, 97% identity. The proteins  
8 used for the multiple alignments have the following annotated locus\_tag or GenBank accession numbers for putative RBP: CSA13, phCSA13\_006; S24-1,  
9 BAL42303; S13', BAL42324; SAP-2, ABV44480. Conserved and identical residues are shaded in gray (dark gray, >70% conserved; light gray, >40% conserved)  
10 and black, respectively.

11 **Table S1.** Functional categories of predicted open reading frames (ORFs) in phage CSA13

| Locus_tag <sup>a</sup> | Group            | Subgroup  | Function                              | BLASTP best match                                                  | Identity (%) <sup>b</sup> | Accession no. <sup>c</sup> |
|------------------------|------------------|-----------|---------------------------------------|--------------------------------------------------------------------|---------------------------|----------------------------|
| phCSA13_001            | Unknown          |           | Hypothetical protein                  | Hypothetical protein SAP2_gp20 [Staphylococcus phage SAP-2]        | 107/134 (80)              | YP_001491545               |
| phCSA13_002            | Unknown          |           | Hypothetical protein                  | Hypothetical protein SAP2_gp19 [Staphylococcus phage SAP-2]        | 59/60 (98)                | YP_001491544               |
| phCSA13_003            | Structure        | Head      | Major capsid protein                  | Major head protein [Staphylococcus phage SAP-2]                    | 405/408 (99)              | YP_001491543               |
| phCSA13_004            | Structure        | Head-tail | Phage upper collar protein            | Putative upper collar protein [Staphylococcus phage GRCS]          | 321/327 (98)              | YP_009004308               |
| phCSA13_005            | Structure        | Head-tail | Phage lower collar protein            | Lower collar protein [Staphylococcus phage SCH111]                 | 239/251 (95)              | APD20965                   |
| phCSA13_006            | Structure        | Tail      | Structure protein, minor tail protein | Structure protein, minor tail protein [Staphylococcus phage S24-1] | 610/642 (95)              | BAL42303                   |
| phCSA13_007            | Lysis            |           | N-acetylmuramoyl-L-alanine amidase    | CHAP domain-containing protein [ <i>Staphylococcus aureus</i> ]    | 230/249 (92)              | WP_031863627               |
| phCSA13_008            | Structure        | Tail      | Phage tail fiber                      | Tail fibers protein [Staphylococcus phage SA4]                     | 271/298 (91)              | ASZ78265                   |
| phCSA13_009            | Structure        | Tail      | Phage tail fiber                      | Major tail protein [Staphylococcus phage Pabna]                    | 577/591 (98)              | AYP28472                   |
| phCSA13_010            | Lysis            |           | Holin                                 | Holin [Staphylococcus phage SAP-2]                                 | 132/140 (94)              | YP_001491536               |
| phCSA13_011            | Unknown          |           | Hypothetical protein                  | Hypothetical protein [Staphylococcus phage SA4]                    | 463/475 (97)              | ASZ78262                   |
| phCSA13_012            | DNA manipulation |           | DNA polymerase                        | DNA polymerase [Staphylococcus phage SAP-2]                        | 749/761 (98)              | YP_001491534               |
| phCSA13_013            | DNA packaging    |           | Phage DNA packaging protein           | DNA packaging protein [Staphylococcus phage SCH1]                  | 412/415 (99)              | APD20934                   |

|             |                  |                       |                                                                    |              |              |
|-------------|------------------|-----------------------|--------------------------------------------------------------------|--------------|--------------|
| phCSA13_014 | Unknown          | Hypothetical protein  | Hypothetical protein SAP2_gp07<br>[Staphylococcus phage SAP-2]     | 149/153 (97) | YP_001491532 |
| phCSA13_015 | Unknown          | Hypothetical protein  | Hypothetical protein<br>[Staphylococcus phage SLPW]                | 56/59 (95)   | YP_009278557 |
| phCSA13_016 | DNA manipulation | ssDNA binding protein | Single stranded DNA-binding protein<br>[Staphylococcus phage SLPW] | 114/122 (93) | YP_009278556 |
| phCSA13_017 | Unknown          | Hypothetical protein  | Hypothetical protein SAP2_gp02<br>[Staphylococcus phage SAP-2]     | 74/78 (95)   | YP_001491527 |
| phCSA13_018 | Unknown          | Hypothetical protein  | Hypothetical protein SAP2_gp01<br>[Staphylococcus phage SAP-2]     | 98/100 (98)  | YP_001491526 |

12

a, Each predicted ORF of phage CSA13 was labeled with locus\_tag; b, Amino acid sequence identity was calculated; c, GenBank accession number of ORF
